# Supplementary material
Source: publisher figshare collection journal article supplement (https://frontiersin.figshare.com/ndownloader/files/20987793)
Supplement: Supplementary file [file 20987793]

## Supplementary Material

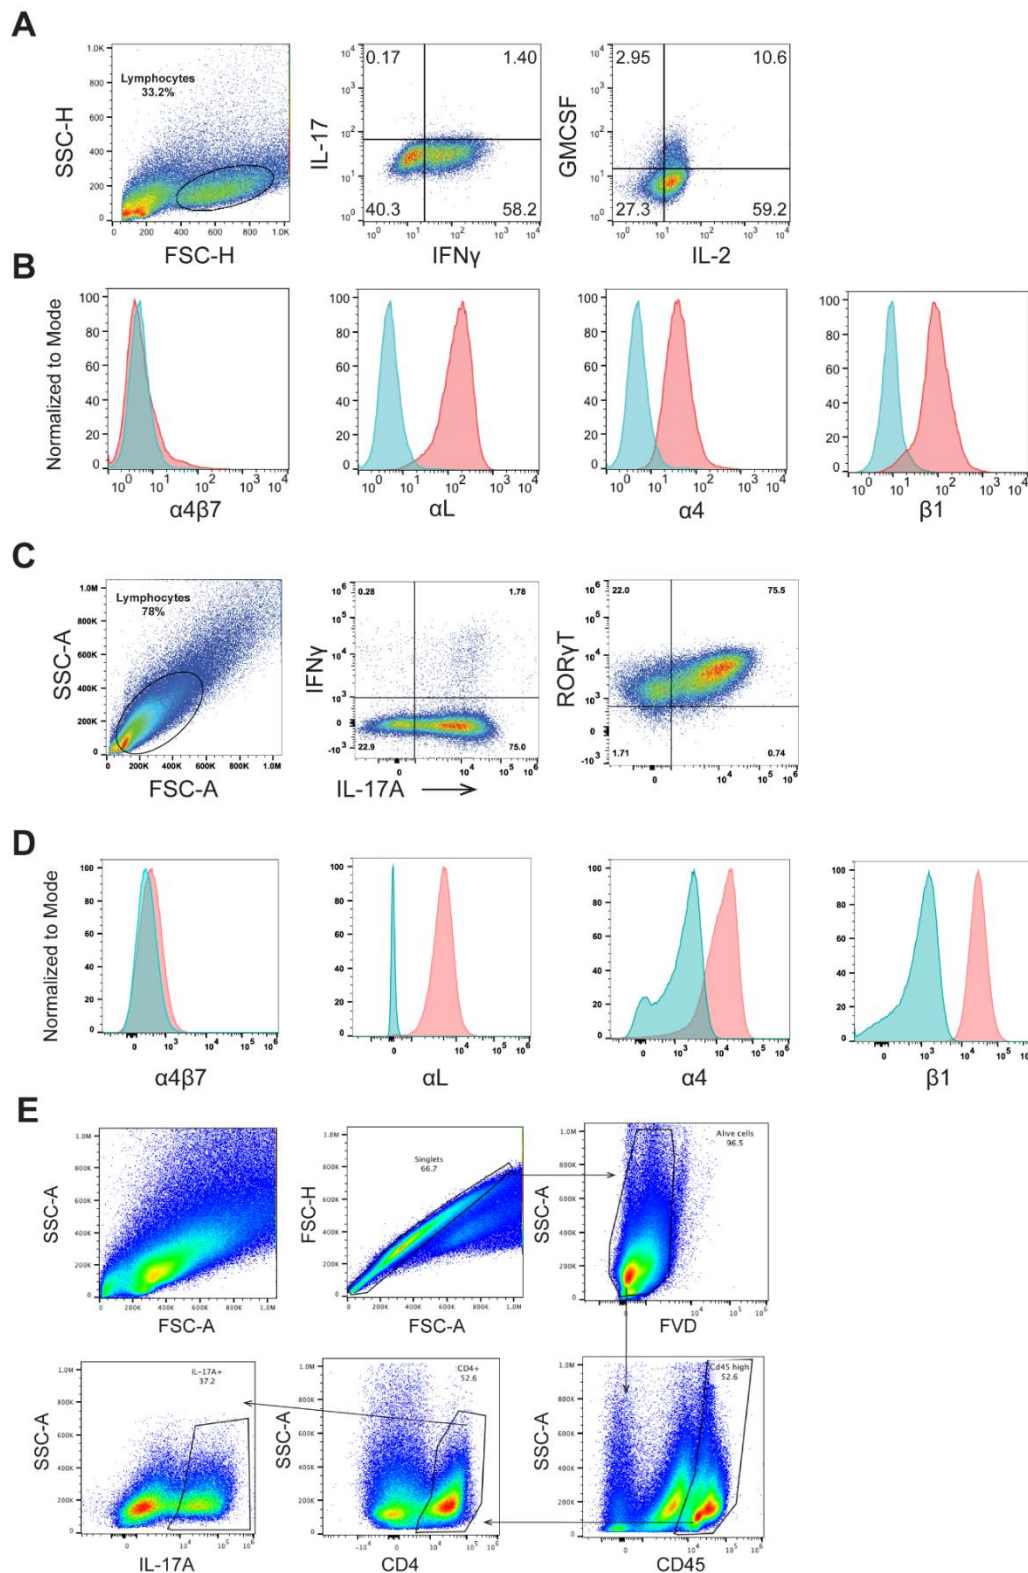

**Supplementary Figure 6. Flow cytometry analysis of *in vitro* polarized Th1 and Th17 cells used for induction of Th1 and Th17 cell-mediated EAE and flow cytometry gating strategy of CD45<sup>+</sup> infiltrated cells in the CNS.**

**(A and B)** Purified CD4<sup>+</sup> T cells harvested from 2D2 C57BL/6J mice were polarized towards Th1 subset (with IL-12 and IL-2) cultured for 9 days. Representative plots from 3 independent experiments. **(A)** Polarization of Th1 cells after 9 days culture was assessed by flow cytometry via production of IFN- $\gamma$  as hallmark cytokine of Th1 cells. Production of IL-17, IL-2 and GM-CSF was analyzed to quantify Th1 subset purity. **(B)** Surface molecules expression of  $\alpha_4\beta_7$ ,  $\alpha_L$ ,  $\alpha_4$  and  $\beta_1$  integrins was evaluated on Th1 cells (red histogram) and the respective isotype Ig (blue histogram) after 9 days of culture. **(C and D)** Purified CD4<sup>+</sup> T cells harvested from 2D2 C57BL/6J mice were polarized towards Th17 subset (with IL-6, TGF $\beta$ 1, anti-IFN- $\gamma$  and anti-IL-4) cultured for 8 days. Representative plots of three independent experiments. **(C)** Polarization of Th17 cells was assessed by flow cytometry via production of IL-17 as signature cytokine of Th17 cells, together with ROR $\gamma$ t as signature transcription factor. IFN- $\gamma$  production was assessed to quantify Th17 subset purity. **(D)** Surface molecules expression of  $\alpha_4\beta_7$ ,  $\alpha_L$ ,  $\alpha_4$  and  $\beta_1$  integrins was evaluated on Th17 cells (red histogram) and the respective isotype Ig was shown in each plot (blue histogram) after 8 days of culture. **(E)** Representative plots of the gating strategy used in the flow cytometry analysis of CD45<sup>+</sup> infiltrated cells in the brain and spinal cord of WT and ICAM-1/-2<sup>-/-</sup> mice suffering from Th17 tEAE. Exclusion of dead cells was performed using Fixable Viability Dye (FVD).
